# Supplementary material
Source: MDPI journal article supplement (https://www.mdpi.com/2311-7524/10/4/334)
Supplement: s1 [file s1]

**Supplementary Materials:** Mass spectrometry graphs associated with the compounds tentatively identified in the extract of *Alternaria leptinellae* E138.

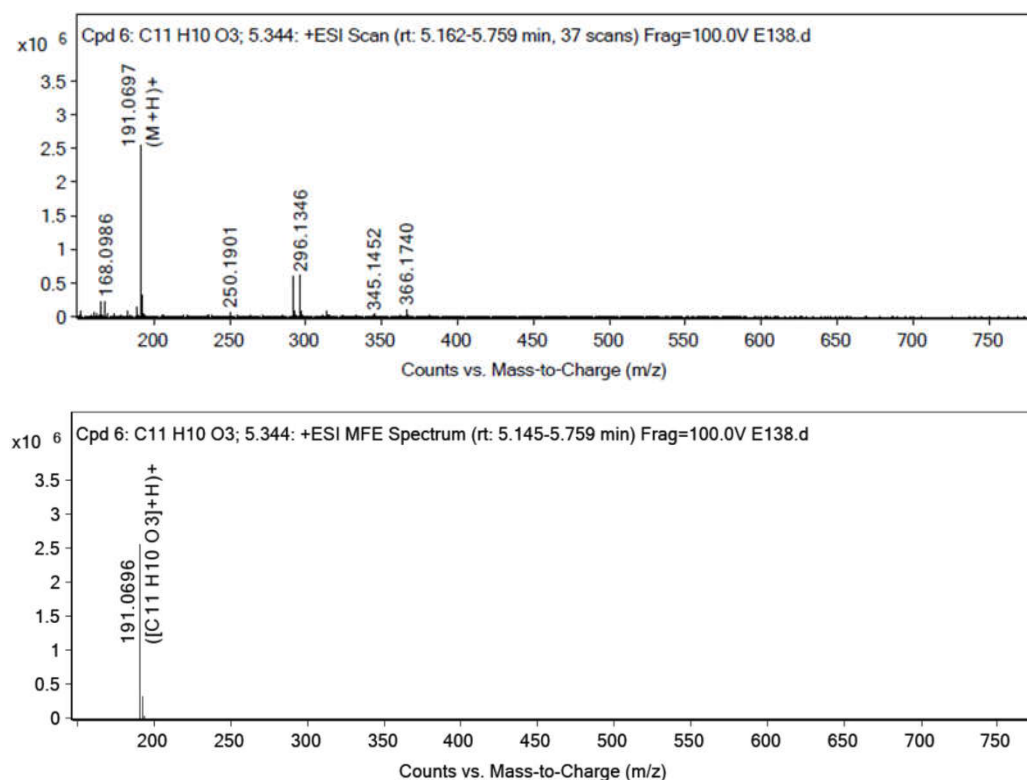

**Figure S1.** ESI-LC-MS mass spectrum extracted from the liquid chromatogram peak (above) and the extracted ion mass spectrum corresponding to the signal of Altechromone A (according to 51,52) at m/z 191.06 (M+H<sup>+</sup>) (below).

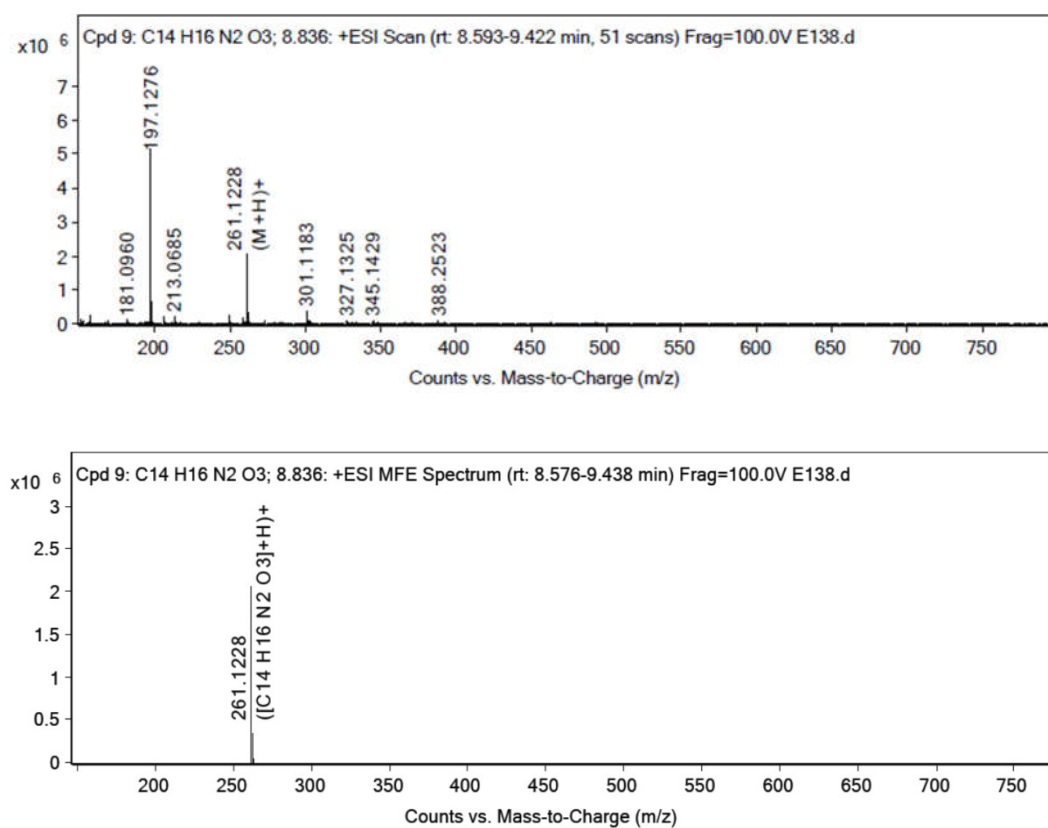

**Figure S2.** ESI-LC-MS mass spectrum extracted from the liquid chromatogram peak (above) and the extracted ion mass spectrum corresponding to the signal of Maculosin (according to 53) at m/z 261.12 (M+H<sup>+</sup>) (below).

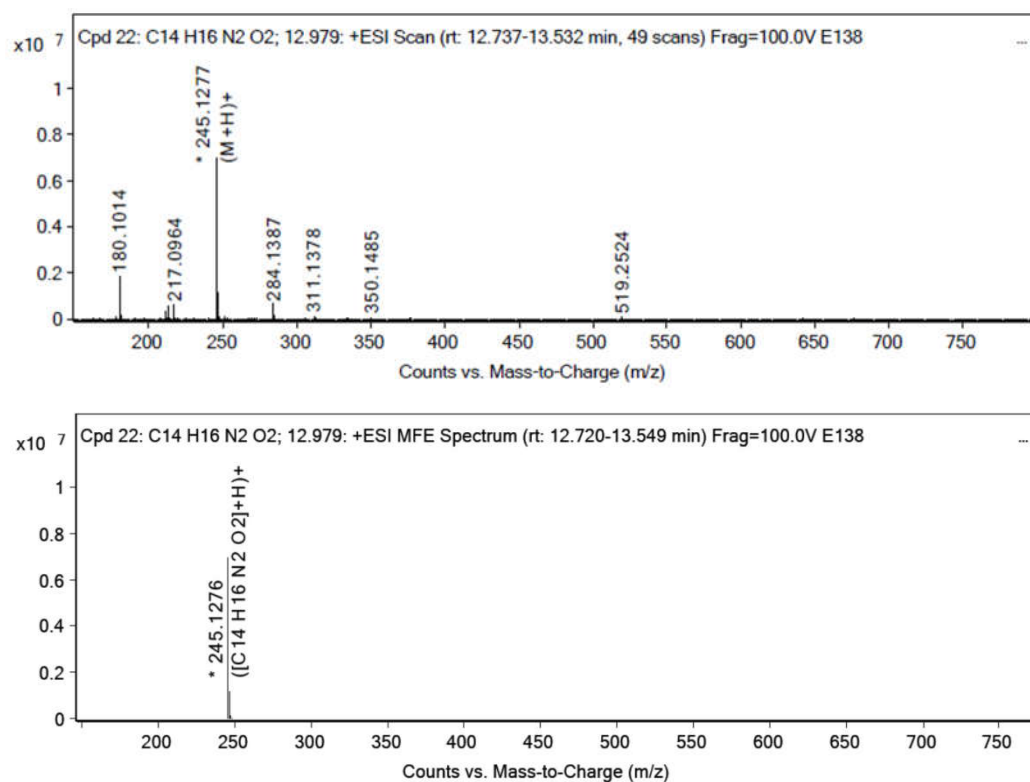

**Figure S3.** ESI-LC-MS mass spectrum extracted from the liquid chromatogram peak (above) and the extracted ion mass spectrum corresponding to the signal of Ciclo(L-Phe-L-Pro; according to 54) at m/z 245.12 (M+H<sup>+</sup>) (below).

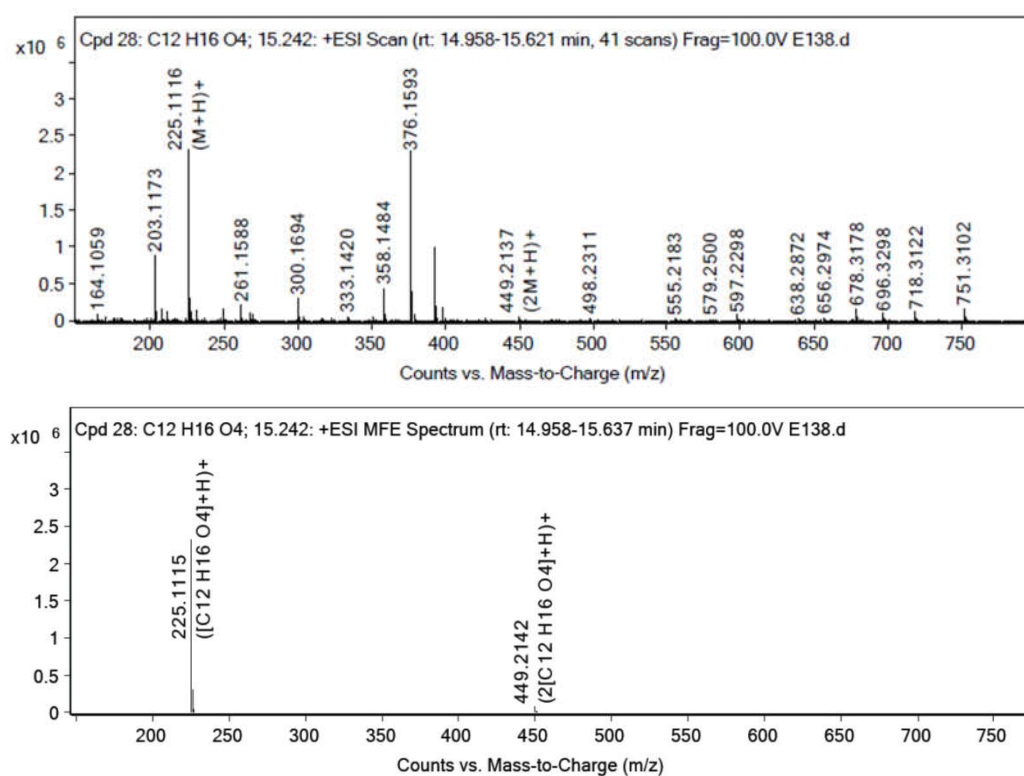

**Figure S4.** ESI-LC-MS mass spectrum extracted from the liquid chromatogram peak (above) and the extracted ion mass spectrum corresponding to the signal of Phomopsis none A (according to 55,56) at m/z 225.11 (M+H<sup>+</sup>) (below).
